# Supplementary material for: A phase II multi-arm study of magrolimab combinations in patients with relapsed/refractory multiple myeloma
Source: PubMed Central journal article supplement — Future Oncol. 2023 Jan 13;19(1):7–17. doi: 10.2217/fon-2022-0975 (PMC10463212; doi:10.2217/fon-2022-0975), 2023-01-13
Supplement: fon-19-07-s1.pdf [file fon-19-07-s1.pdf]

# A Phase 2, Multi-Arm Study of Magrolimab Combinations in Patients With Relapsed/Refractory Multiple Myeloma

Authors: Barry Paul, Michaela Liedtke, Jack Khouri, Robert Rifkin, Mitul D. Gandhi, Andrew Kin, Moshe Y. Levy, Rebecca Silbermann, Francesca Cottini, Douglas W. Sborov, Irwindeep Sandhu, Lyssa Villarreal, Michael Murphy, Lin Gu, Ann Chen, Nishanthan Rajakumaraswamy, and Saad Z. Usmani

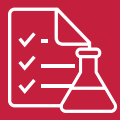

## Study Design

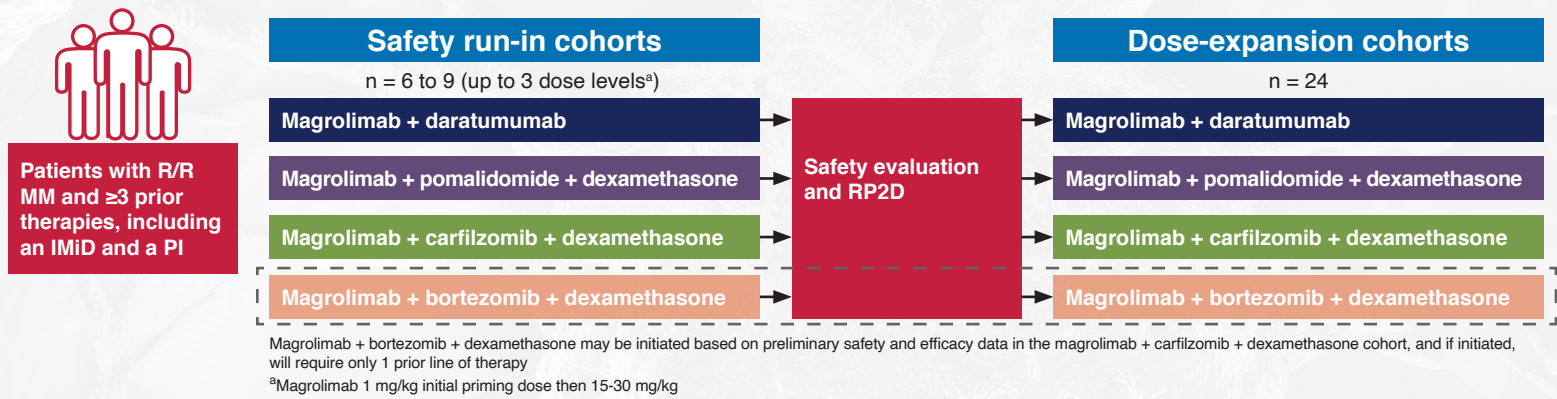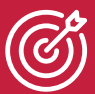

## Primary Objectives

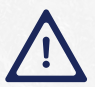

### Safety run-in cohorts

- Evaluate safety and tolerability of magrolimab with other therapies
- Determine the RP2D

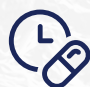

### Dose-expansion cohorts

- Evaluate the efficacy of magrolimab with other therapies, as determined by ORR

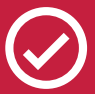

## Key Inclusion Criteria

- Adults (≥18 years) with previously diagnosed MM currently requiring treatment
- Measurable disease, defined as ≥1 of the following: serum M-protein level ≥0.5 g/dl, urine M-protein level ≥200 mg/24 hours, and/or SFLC level ≥100 mg/l with abnormal SFLC ratio
- At least 3 previous lines of therapy, including an IMiD and a PI
- ECOG PS ≤2
- ANC ≥1000 cells/μl, platelet count ≥75,000 cells/μl, and hemoglobin level ≥9.0 g/dl

Patients who have previously received daratumumab or pomalidomide are eligible for enrollment.

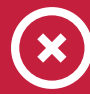

## Key Exclusion Criteria

- Known amyloidosis, including myeloma complicated by amyloidosis
- MM of immunoglobulin M subtype
- Waldenström macroglobulinemia or myelodysplastic syndromes
- Plasma cell leukemia
- POEMS syndrome
- Immunotherapy or chemotherapy within 28 days prior to enrollment
- Prior treatment with CD47- or SIRPα-targeting agents

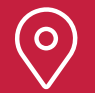

## Study End Points

| Safety run-in cohorts                                                                                                  | Dose-expansion cohorts                                                                                                                                                                                                                                                                                                                                                                                         |
|------------------------------------------------------------------------------------------------------------------------|----------------------------------------------------------------------------------------------------------------------------------------------------------------------------------------------------------------------------------------------------------------------------------------------------------------------------------------------------------------------------------------------------------------|
| <p><b>Primary</b></p> <ul style="list-style-type: none"> <li>DLTs and AEs</li> <li>Laboratory abnormalities</li> </ul> | <p><b>Primary</b></p> <ul style="list-style-type: none"> <li>ORR</li> </ul> <p><b>Secondary</b></p> <ul style="list-style-type: none"> <li>Safety: AEs and laboratory abnormalities</li> <li>Efficacy: DOR, PFS, OS</li> <li>PK and ADAs</li> </ul>                                                                                                                                                            |
|                                                                                                                        | <p><b>Exploratory</b></p> <ul style="list-style-type: none"> <li>MRD negativity rate</li> <li>Mutational profile of myeloma cells and correlation with clinical response</li> <li>Changes from baseline in biomarkers of immune cell recruitment</li> <li>Changes from baseline in known phagocytic regulators in myeloma cells</li> <li>Change from baseline in FACT-MM questionnaire</li> <li>TTR</li> </ul> |

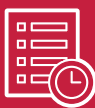

## Timeline of Key Assessments for Expansion Cohorts

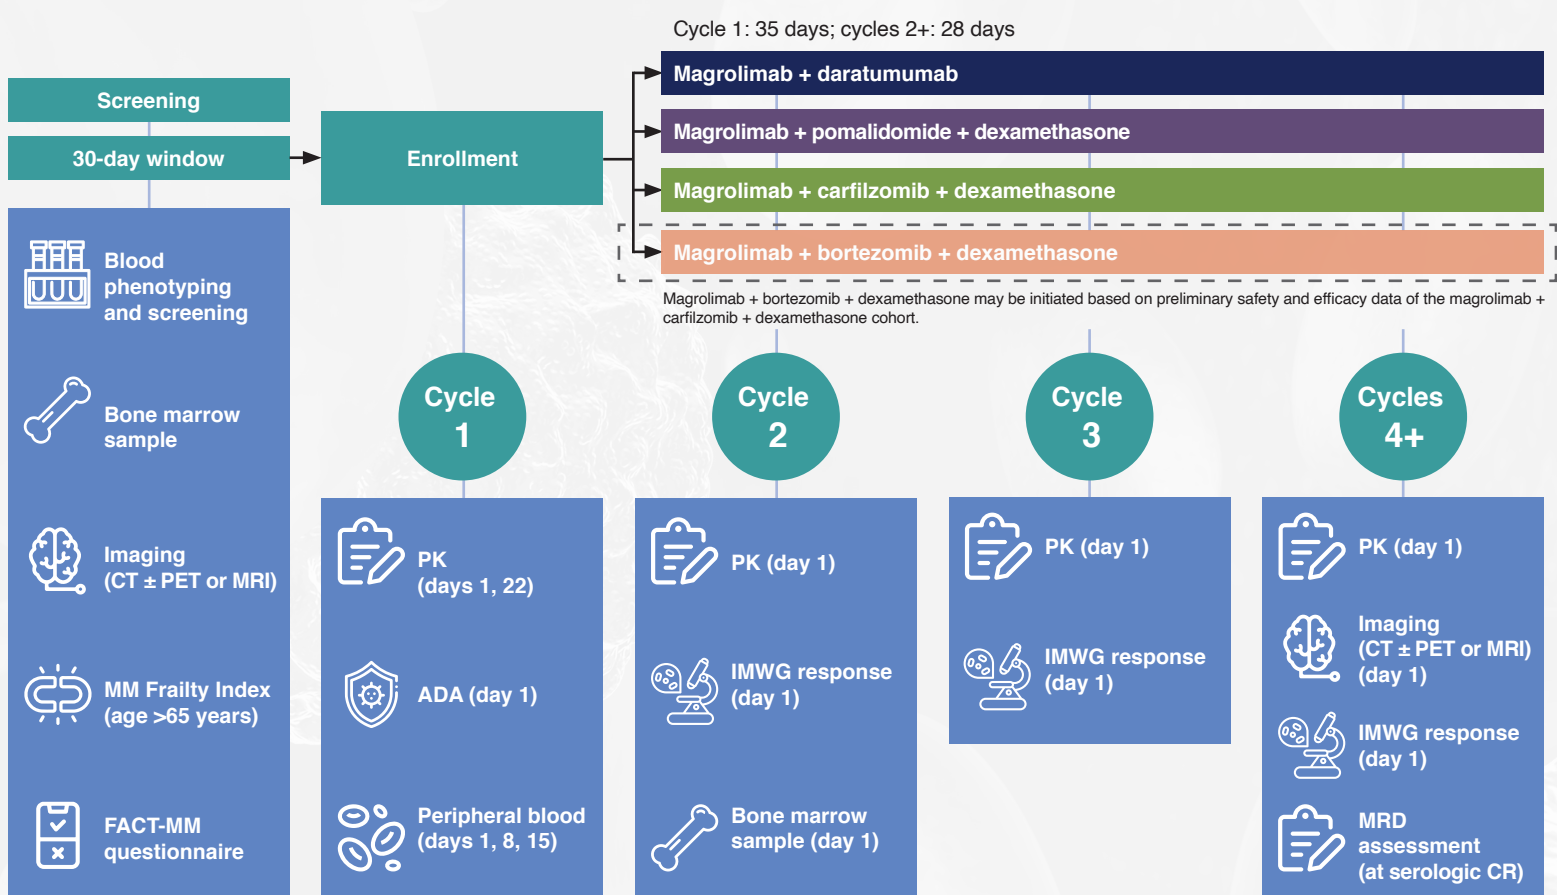

NCT04892446

ADA, antidrug antibody; AE, adverse event; ANC, absolute neutrophil count; CD, cluster of differentiation; CR, complete response; CT, computed tomography; DLT, dose-limiting toxicity; DOR, duration of response; ECOG, Eastern Cooperative Oncology Group; FACT-MM, Functional Assessment of Cancer Therapy – Multiple Myeloma; IMiD, immunomodulatory drug; IMWG, International Myeloma Working Group; MM, multiple myeloma; MRD, minimal residual disease; MRI, magnetic resonance imaging; ORR, objective response rate; OS, overall survival; PET, positron emission tomography; PFS, progression-free survival; PI, proteasome inhibitor; PK, pharmacokinetics; POEMS, plasma cell dyscrasia with polyneuropathy, organomegaly, endocrinopathy, M-protein, and skin changes; PS, performance status; RP2D, recommended phase 2 dose; R/R, relapsed/refractory; SFLC, serum free light chain; SIRPα, signal regulatory protein α; TTR, time to response.
